RESEARCH ARTICLE

# Peripheral Nerve Transplantation Combined with Acidic Fibroblast Growth Factor and Chondroitinase Induces Regeneration and Improves Urinary Function in Complete Spinal Cord Transected Adult Mice

Marc A. DePaul<sup>1</sup>, Ching-Yi Lin<sup>2</sup>, Jerry Silver<sup>1</sup>, Yu-Shang Lee<sup>2\*</sup>

**1** Department of Neurosciences, Case Western Reserve University, Cleveland, Ohio, United States of America, **2** Department of Neurosciences, Lerner Research Institute, Cleveland Clinic, Cleveland, Ohio, United States of America

\* [leey2@ccf.org](mailto:leey2@ccf.org)

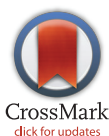

**OPEN ACCESS**

**Citation:** DePaul MA, Lin C-Y, Silver J, Lee Y-S (2015) Peripheral Nerve Transplantation Combined with Acidic Fibroblast Growth Factor and Chondroitinase Induces Regeneration and Improves Urinary Function in Complete Spinal Cord Transected Adult Mice. PLoS ONE 10(10): e0139335. doi:10.1371/journal.pone.0139335

**Editor:** Simone Di Giovanni, Hertie Institute for Clinical Brain Research, University of Tuebingen., GERMANY

**Received:** April 20, 2015

**Accepted:** September 11, 2015

**Published:** October 1, 2015

**Copyright:** © 2015 DePaul et al. This is an open access article distributed under the terms of the [Creative Commons Attribution License](https://creativecommons.org/licenses/by/4.0/), which permits unrestricted use, distribution, and reproduction in any medium, provided the original author and source are credited.

**Data Availability Statement:** All relevant data are included in the paper.

**Funding:** This work was funded by National Institutes of Health/National Institute of Neurological Disorders and Stroke (NIH.GOV) NS069765 to YSL, and National Institutes of Health/National Institute of Neurological Disorders and Stroke NS025713 to JS.

**Competing Interests:** The authors have declared that no competing interests exist.

## Abstract

The loss of lower urinary tract (LUT) control is a ubiquitous consequence of a complete spinal cord injury, attributed to a lack of regeneration of supraspinal pathways controlling the bladder. Previous work in our lab has utilized a combinatorial therapy of peripheral nerve autografts (PNG), acidic fibroblast growth factor (aFGF), and chondroitinase ABC (ChABC) to treat a complete T8 spinal cord transection in the adult rat, resulting in supraspinal control of bladder function. In the present study we extended these findings by examining the use of the combinatorial PNG+aFGF+ChABC treatment in a T8 transected mouse model, which more closely models human urinary deficits following spinal cord injury. Cystometry analysis and external urethral sphincter electromyograms reveal that treatment with PNG+aFGF+ChABC reduced bladder weight, improved bladder and external urethral sphincter histology, and significantly enhanced LUT function, resulting in more efficient voiding. Treated mice's injured spinal cord also showed a reduction in collagen scarring, and regeneration of serotonergic and tyrosine hydroxylase-positive axons across the lesion and into the distal spinal cord. Regeneration of serotonin axons correlated with LUT recovery. These results suggest that our mouse model of LUT dysfunction recapitulates the results found in the rat model and may be used to further investigate genetic contributions to regeneration failure.

## Introduction

Axonal regeneration following spinal cord injury (SCI) in the adult is limited and abortive. Regeneration failure has been attributed to many factors including myelin inhibition [1], extracellular matrix-associated inhibitors [2], a decrease of intrinsic growth-promoting gene expression [3,4], secondary injury cascades involving the immune response [5], and lack of trophic

support [6]. Targeting a single factor can increase axonal sparing, regeneration, and/or sprouting [7] into or around the lesion site, but the extent of growth is modest. Instead, an approach combining several targets can act synergistically to promote robust regeneration [8–10]. For example, using peripheral nerve autografts (PNGs) to bridge a complete spinal cord lesion in combination with acidic fibroblast growth factor (aFGF) and chondroitinase ABC (ChABC) leads to long-distance axonal regeneration and restores supraspinal control of bladder function in a complete transection rat SCI. Removing even one factor from this approach diminishes recovery and axonal regeneration [8]. While most complex combinatorial approaches have been conducted in rats, mice can offer greater insight into genetic contributions to SCI failure [3,4,11]. Mouse studies often target a single gene or a related family of genes and have shown great promise in promoting regeneration but, thus far, have resulted in only minimal recovery [12,13].

A robust and evolutionally conserved mechanism of SCI therapy should effectively treat injuries in any mammal, even when the pathology and recovery can be vastly different from species to species. Closely related organisms such as the rat and mouse can differ drastically in response to SCI. In rats, a fluid-filled cystic cavity forms at the site of injury, while the injured mouse spinal cord becomes filled with fibrous connective tissue and a dense distribution of collagen scarring [14,15]. The inflammatory response is distinct between the two species, leading to different cell populations in and around the lesion [16]. Physiological recovery differences after severe SCI also exist. Partial recovery of the lower urinary tract (LUT) is spontaneous in the rat [17–19], while mice never regain the ability to urinate after severe SCI [15]. Under normal physiological conditions, external urethral sphincter (EUS) muscle recruitment differs between rats and mice. In rats, EUS pumping activity causes high frequency oscillations in bladder pressure, and is necessary for voiding, however, EUS bursting coupled with high frequency bladder pressure oscillations are not observed in the mouse during a void. Instead, the mouse EUS displays silent periods or periods of low EUS activity that lack bladder pressure oscillations, similar to what is seen in humans [20]. Ideally, animal models should reproduce all the facets of the human condition, but it is inconceivable that any single animal model will recapitulate every aspect of normal or SCI pathology. For these reasons, a mouse model of SCI may better represent bladder dysfunction in the human condition, as the loss of LUT control is a permanent ubiquitous consequence of SCI in humans and is a top priority of the SCI population [21,22].

In this present study we used a well-documented SCI combinatorial repair strategy first developed in a rat model and now adopted to a mouse model [8,23–25]. Specifically, we used multiple PNGs covered by an aFGF-laden fibrin matrix plus ChABC and aFGF delivered to the graft and graft/host interfaces to create an environment favorable for regeneration that, for the first time in a complete transection mouse model, demonstrated improvements in LUT function.

## Materials and Methods

### Animal groups

Thirty-seven adult female C57BL/6 mice (8 to 10 weeks old) were divided randomly into three groups: (1) T8 spinal cord transection only (Tx-only;  $n = 15$ ), (2) T8 spinal cord transection with PNG+aFGF+ChABC treatment (PNG+aFGF+ChABC;  $n = 15$ ), (3) naïve animal without SCI ( $n = 7$ ). Five mice were removed from the study (three from the PNG+aFGF+ChABC group and two from the TX-only group) due to bladder infections and/or bladder stones and were not included in any analyses.

## Mouse spinal cord surgery, multiple peripheral nerve segment transplantation, and ChABC & aFGF injection

All sterile surgical procedures were carried out in strict accordance with the recommendations in the Guide for the Care and Use of Laboratory Animals of the National Institutes of Health. The protocol was approved by the Case Western Reserve University animal resource center and institutional care and use committee. Surgery was performed under 2% isoflurane mixed with oxygen anesthesia, and all efforts were made to minimize suffering. Mice were supported on a heating pad controlled by a rectal thermometer maintained within 1.5°C of normal temperature. In all SCI groups, the thoracic spinal cord was exposed via T8 laminectomy. In the TX-only group the spinal cord was transected by two parallel transverse cuts, creating a 0.5 mm gap when the tissue was removed. The PNG+aFGF+ChABC group underwent a spinal cord transection as described above and 2  $\mu$ l (1  $\mu$ l at each cord stump adjacent to the lesion) of 1:1 ChABC (1U/ml) & aFGF (1 g) mixture was injected into the spinal cord via a Nanoject II (Drummond Scientific Company). The intercostal nerves were removed, soaked in ChABC (1U/ml) for 30 min, and an autograft was constructed from 9–15 intercostal nerve segments spanning the lesion, as described previously in rat [24]. The graft was supported using an aFGF/ChABC/fibrin glue. 4–0 monofilament sutures were used to close the skin and musculature. Bladders were manually expressed twice per day until the end of the study.

## Urodynamics/cystometrogram and electromyography recordings

Mice at 18 weeks post-SCI were anesthetized with 1.5% isoflurane mixed with oxygen. A polyethylene-50 catheter was carefully inserted through the urethra into the bladder for the delivery of saline and bladder pressure monitoring. Teflon-insulated silver wire electrodes (0.003" diameter, 2 mm exposed tip; A-M Systems) were inserted percutaneously via the vagina on both sides of the urethra to monitor EUS electromyography (EMG) activity. The mice were placed in a restraining apparatus and allowed to recover from anesthesia. Bladders were emptied prior to the start of saline infusion. Continuous cystometrograms (CMGs) were collected using constant infusion (1.5 ml/hr) of room temperature saline (Aladdin-1000 single syringe infusion pump; World Precision Instruments) through the catheter and into the bladder to elicit repetitive voids, which allowed collection of data for a large number of voiding cycles. The electrodes were connected to a preamplifier (HZP; Grass-Technologies), which was connected to an amplifier (QP511, Grass-Technologies) with high- and low-pass frequency filters at 30 Hz and 3 kHz and a recording system (Power 1401, Spike2; Cambridge Electronic Design) at a sample frequency of 10kHz. The bladder pressure was recorded via the same catheter used for saline infusion, using a pressure transducer (P11T, Grass-Technologies) connected to the recording system at a sample frequency of 2kHz.

## Urodynamic quantification

Mice began infusion of saline with an empty bladder. The time point where the first void occurred was used to calculate the bladder volume at first void (time x rate of infusion). Continuous saline infusion elicited repetitive voiding. The bladder contraction interval was determined by measuring the average time between bladder contractions. The change in pressure during void was measured as the bladder pressure at the peak of a void minus the pressure immediately prior to the void. The pressure difference from baseline to post-void was measured as the lowest pressure recorded after the first void minus the pressure at the start of saline infusion. Following the last void the catheter was removed and residual bladder saline was expressed to measure residual volume.

## Bladder weight and morphology

Animals were perfused transcardially with 4% paraformaldehyde (PFA) in 0.01 M PBS, pH 7.4. The bladders of all animals were collected and the wet weights were recorded. Bladders were further fixed with 4% PFA for 1 day and then transferred to 30% sucrose, sectioned transversely (8  $\mu$ m) at the level of mid-bladder with a cryostat, and stained with Masson's trichrome for additional morphological analysis under a light microscope.

## Spinal cord histology

Following perfusion, spinal cords from all animals were collected and immersed in a 30% sucrose solution. Sagittal sections (30  $\mu$ m thick for immune staining, 10  $\mu$ m thick for Masson's trichrome staining) of the spinal cord were cut using a cryostat and collected for immunostaining or Masson's trichrome staining. For immunostaining, sections were blocked in 3% normal horse serum with 0.25% Triton X-100 in PBS for 1 hour. After blocking, sections were exposed to anti-tyrosine hydroxylase (TH) polyclonal antibody (1:1000 dilution, Protos Biotechnology) or anti-serotonin (5-HT) polyclonal antibody (1:1500 dilution; DiaSorin, Stillwater, MN, USA), and anti-gial fibrillary acidic protein (GFAP) for astrocytes (1:500 dilution; DakoCytomation, Carpinteria, CA, USA) and incubated overnight at room temperature. After 3 rinses in PBS, sections were incubated with species-appropriate secondary antisera conjugated with Alexa Fluor 594 or Alexa Fluor 488 (Invitrogen/Molecular Probes) for 90 min, washed, and coverslipped with Vectashield (Vector Laboratories Inc., Burlingame, CA, USA). All sections were examined under a microscope with fluorescent light and the distribution of TH and 5-HT fibers was analyzed in multiple parallel sections using a camera lucida method. Further images were collected using a Carl Zeiss LSM 510META confocal microscope. Masson's trichrome staining of the spinal cord was conducted in the same manner as the bladder. For collagen quantification, sections were imaged under a light microscope. For each animal, the area 500 $\mu$ m rostral and 500 $\mu$ m caudal from the lesion epicenter were quantified and averaged over 5 serial sections to obtain a single measurement per animal of the collagen area squared.

## Statistical analyses

All data are reported as mean  $\pm$  standard error of the mean. All data sets except for collagen quantification were analyzed using Unpaired Student's T tests comparing TX-only to PNG + aFGF + ChABC groups. Collagen quantification was analyzed using Two-way ANOVA. Significance was determined at  $p < 0.05$ . Naïve animals are included for comparison only and were not included in the statistics since they did not receive an injury. 5-HT and TH correlation to bladder recovery was determined using Pearson product-moment correlation coefficient. All behavior tests and data analysis were done in a blinded fashion during this entire study.

## Results

### PNG + aFGF + ChABC improved and EUS EMG activity in spinal cord-transected mice

Measurements of bladder contractions and EUS activity were used to investigate the quality of bladder function at 18 weeks after SCI. Recordings were performed on awake and restrained animals. Movement artifacts in naïve recordings were evident and frequent (Naïve, [Fig 1A](#)) but could easily be separated from relevant events. Minimal movement artifacts were seen in spinalized mice. Thirteen animals in the Tx-only group, twelve in the PNG+aFGF+ChABC group, and seven in the naïve group were used in this investigation.

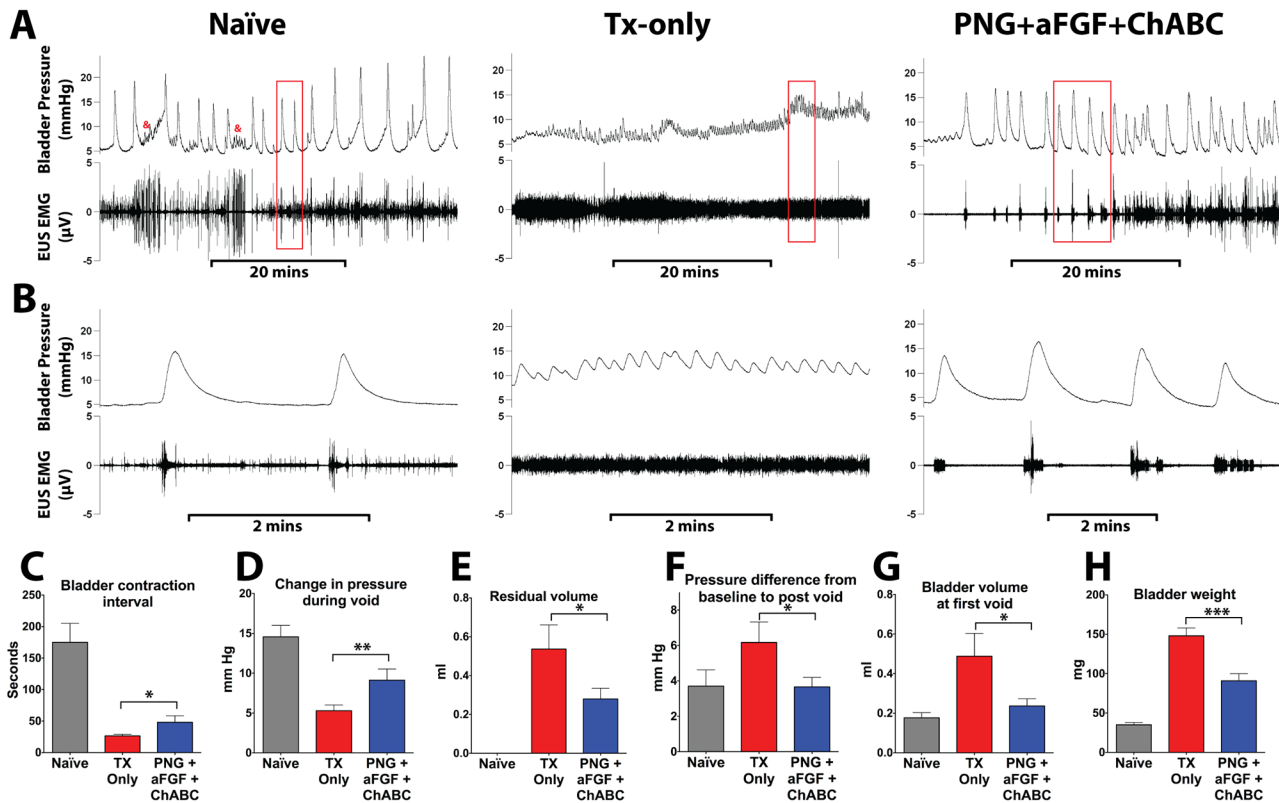

**Fig 1. PNG+aFGF+ChABC treatment improves urodynamics after complete SCI.** (A) Representative voiding cycles of bladder pressure (top panel) and EUS EMG activity (bottom panel) were recorded from each group 18 weeks post-complete spinal cord transection. Kicking artifacts in naïve bladder tracings are denoted by &. (B) The box area in (A) indicates the magnification of bladder pressure and EUS EMG activity. Quantification of CMG results shows that PNG+aFGF+ChABC-treated animals (C) increased the time between bladder contractions, (D) had stronger bladder contractions during voids, (E) had a smaller residual volume after a void, (F) that pressure following a void was closer to baseline pressure, (G) voided at smaller bladder volumes, and (H) had a smaller bladder weight when compared to TX-only. \* $p < 0.05$ , \*\* $p < 0.01$ , \*\*\* $p < .001$ .

doi:10.1371/journal.pone.0139335.g001

During continuous infusion CMG, the naïve group displayed low-amplitude tonic EUS-EMG activity between voids (Naïve, Fig 1A and 1B). At the onset of a bladder contraction, the EUS-EMG activity increased in amplitude and persisted as the pressure rose, falling at the peak of the contraction coinciding with a void (Naïve, Fig 1B). In transected mice, the coordination between rising bladder pressure and EUS activity was lost and the EUS fired tonically throughout the bladder contraction (TX-only, Fig 1A and 1B), resulting in severe detrusor sphincter dyssynergia. Animals receiving PNG+aFGF+ChABC showed an increase in EUS-EMG activity in response to rising bladder pressure and an improvement in bladder and EUS coordination, similar to what was seen in the naïve group (PNG+aFGF+ChABC, Fig 1A and 1B).

In the naïve group, bladder contractions were associated with voiding events. The few bladder contractions outside of voiding events were associated with movement within the restrainer (Naïve Fig 1A). At eight weeks post-SCI, there was no difference in CMG-EUS EMG data between the TX-only and PNG+aFGF+ChABC groups (data not shown). However, at 18 weeks post-SCI, the TX-only group had many non-voiding contractions, and in many recordings voiding and non-voiding contractions could not be distinguished. These contractions were typically very small and close together (TX-only Fig 1A). In contrast, bladder contractions in the PNG+aFGF+ChABC group at 18 weeks post-SCI were often associated with a voiding



event, although they still showed signs of a hyperactive bladder (PNG+aFGF+ChABC, Fig 1A). The time between bladder contractions increased in the PNG+aFGF+ChABC group ( $48.07 \pm 10.32$  seconds) compared to the TX-only group ( $26.54 \pm 2.33$ ,  $p < 0.05$ , Fig 1C), suggesting that the treatment alleviated symptoms of bladder hyperactivity.

Bladder contractions resulting in a void occurred at similar pressures between the spinal cord-injured groups (TX-only =  $11.56 \pm 1.16$  mmHg; PNG+aFGF+ChABC =  $9.80 \pm 0.72$ ,  $p = 0.109$  mmHg) but the pressure generated by the PNG+aFGF+ChABC group was significantly larger ( $9.14 \pm 1.40$  mmHg) than in TX-only ( $5.29 \pm 0.72$  mmHg,  $p < 0.01$ , Fig 1D). The pressure following a void also returned closer to the baseline in the combinatorial group (PNG+aFGF+ChABC =  $3.66 \pm 0.54$  mmHg above baseline, TX-only =  $6.17 \pm 1.17$  mmHg above baseline,  $p < 0.05$ , Fig 1E), resulting in more efficient voiding and a smaller residual volume (PNG+aFGF+ChABC =  $0.28 \pm 0.06$  ml; TX-only =  $0.54 \pm 0.12$  ml,  $p < 0.05$ , Fig 1F). The CMG analysis also showed that the first void of the PNG+aFGF+ChABC group occurred at a smaller volume ( $0.16 \pm 0.02$  ml) compared to TX-only ( $0.33 \pm 0.08$  ml,  $p < 0.05$ , Fig 1G). Together, the CMG data indicate that mice treated with a combination of PNG+aFGF+ChABC show significant improvements in bladder voiding and a reduction in bladder hyperreflexia.

### PNG+aFGF+ChABC treatment improved LUT morphology

We next examined the anatomical changes that may underlie the improvements seen in LUT physiology. Comparing gross observations of the bladder 18 weeks after SCI, mice in the PNG+aFGF+ChABC group had smaller bladders that weighed significantly less than those in the TX-only group (Figs 1H, 2B and 2C), although both injury groups had larger and heavier bladders than naïve mice (Figs 1H and 2A). Masson's trichrome stain of the bladder revealed preserved architecture and less bladder distension with greater organization of the muscle and lamina propria in PNG+aFGF+ChABC animals compared to the TX-only group (Fig 2D–2I).

EUS muscle fibers of the PNG+aFGF+ChABC group were long and continuous (Fig 2J), similar to the naïve group (Fig 2J), while the TX-only group had a greater occurrence of connective tissue between short and discontinuous muscle fibers (Fig 2K). The denervation of motor neurons controlling EUS causes tonic activity of EUS after complete SCI. The constant tonic activity of EUS and severe detrusor sphincter dyssynergia may contribute to the muscle loss and degradation. These results suggest preservation of muscle and architecture in the LUT with PNG+aFGF+ChABC treatment.

### PNG+aFGF+ChABC treatment reduces collagen scarring

We next examined the lesion of the TX-only and PNG+aFGF+ChABC for differences in gross anatomy and scarring. In the TX-only group, the rostral and caudal stumps of the lesioned cord were connected by thin, translucent tissue containing a dense collagen matrix (Fig 3A and 3B). The distribution of collagen dense deposits can be observed in the lesion gap, in the periphery around the cord, and inside the spinal cord tissue from both rostral and caudal end. In contrast, the lesioned cord of animals receiving PNG+aFGF+ChABC treatment were thick and opaque with dense peripheral nerve grafts bridging the rostral and caudal stumps completely filling the lesion, giving an appearing of a continuous interface across the lesion (Fig 3A). The collagen matrix of PNG+aFGF+ChABC treated animals was less dense and covered significantly less area than that of the TX-only treatment (Fig 3B and 3C). To compare the mouse response to injury to that of the rat, we collected available complete spinal cord transection tissue in our laboratory and stained for collagen. The rat lesion had very little collagen scarring compared to the mouse, illustrating the difference in scar composition between the two species (S1 Fig). These

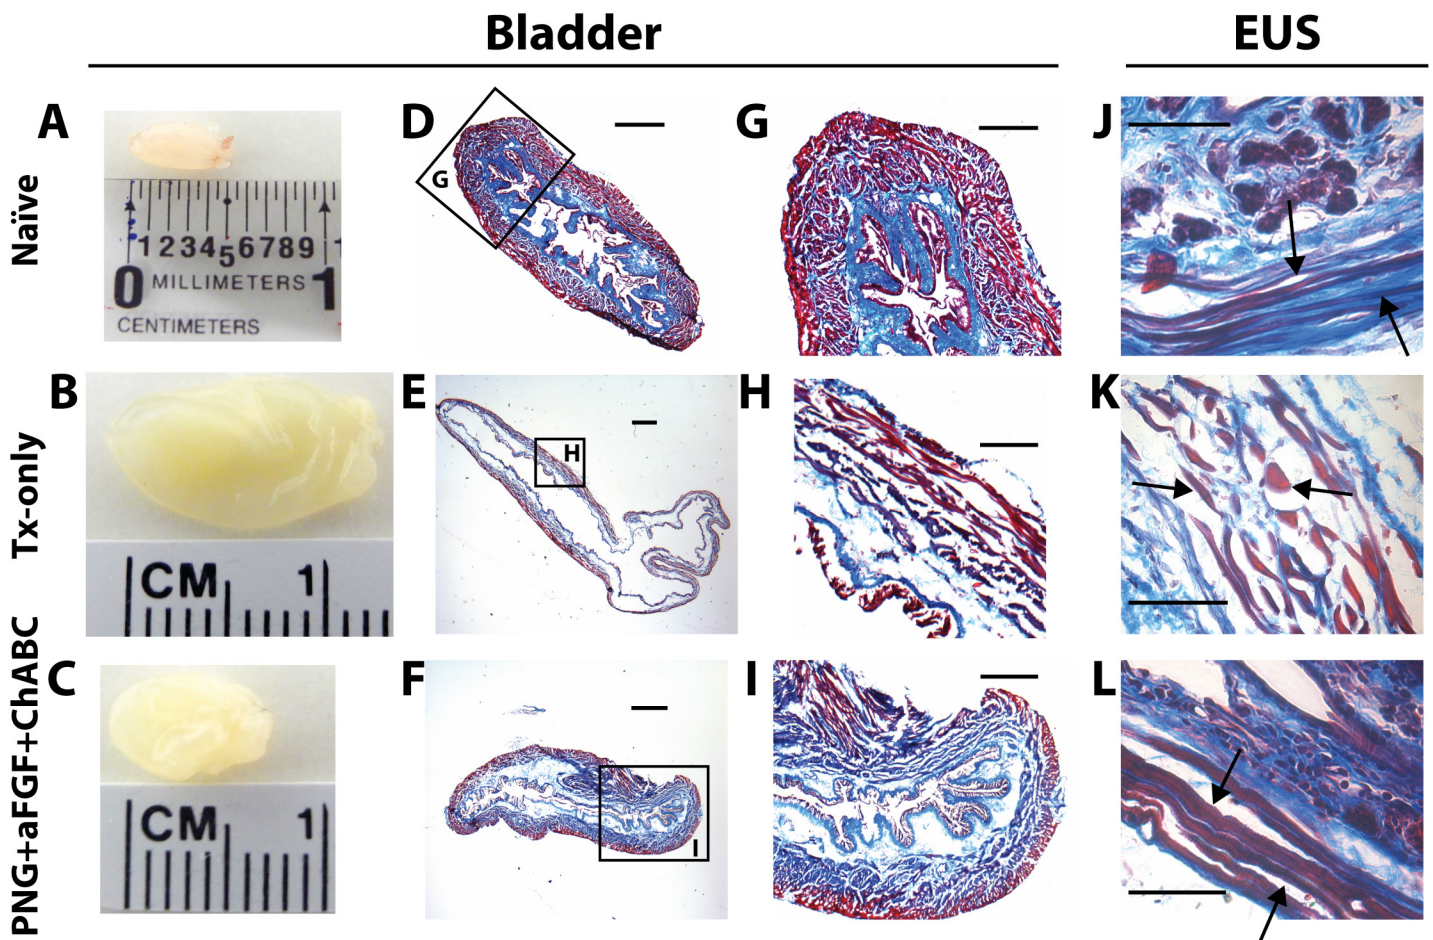

**Fig 2. PNG+aFGF+ChABC treatment improves bladder and EUS morphology.** (A-C) Gross observation of the bladder at 18 weeks after SCI in naïve (A), TX-only (B), and PNG+aFGF+ChABC animals (C). (D-F) Photomicrographs of transverse bladder sections stained with Masson's trichrome from naïve (D), TX-only (E), and PNG+aFGF+ChABC animals (F). Scale bar, 500µm. (G-I) Higher magnification of photomicrographs from boxed area (D-F) shows details of the bladder structure. Note that PNG+aFGF+ChABC animals showed improved bladder morphology. Sale bar, 250µm. (J-L) Photomicrographs of transverse EUS sections stained with Masson's trichrome from naïve(J), TX-only (K), and PNG+aFGF+ChABC animals (L). The TX-only animals show swelling as well as short and discontinuous muscle fibers (arrow), while the PNG+aFGF+ChABC animals show continuous and long muscle fibers (arrow), similar in morphology to naïve animals (arrow). Scale bar, 500µm.

doi:10.1371/journal.pone.0139335.g002

results suggest that PNG+aFGF+ChABC treatment can significantly reduce collagen scarring in the mouse, which can facilitate axonal regeneration by decreasing the physical scar barrier.

### Regeneration of 5-HT and TH fibers crossing the PNG into the caudal spinal cord

Given the voiding improvements in mice receiving PNG+aFGF+ChABC treatment and a reduction in collagen scarring, we next examined whether axonal regrowth extended beyond the caudal PNG-spinal cord interface. Regeneration into the bridge and well beyond the transection site in the rat model has been more extensively studied and has been found to be critical in the recovery of urinary function. In the mouse, immunostained 5-HT and TH axons were traced via camera lucida projections of consecutive serial parasagittal sections for the TX-only (Fig 4A and 4C) and PNG+aFGF+ChABC (Fig 4E and 4G) groups. 5-HT- and TH-positive

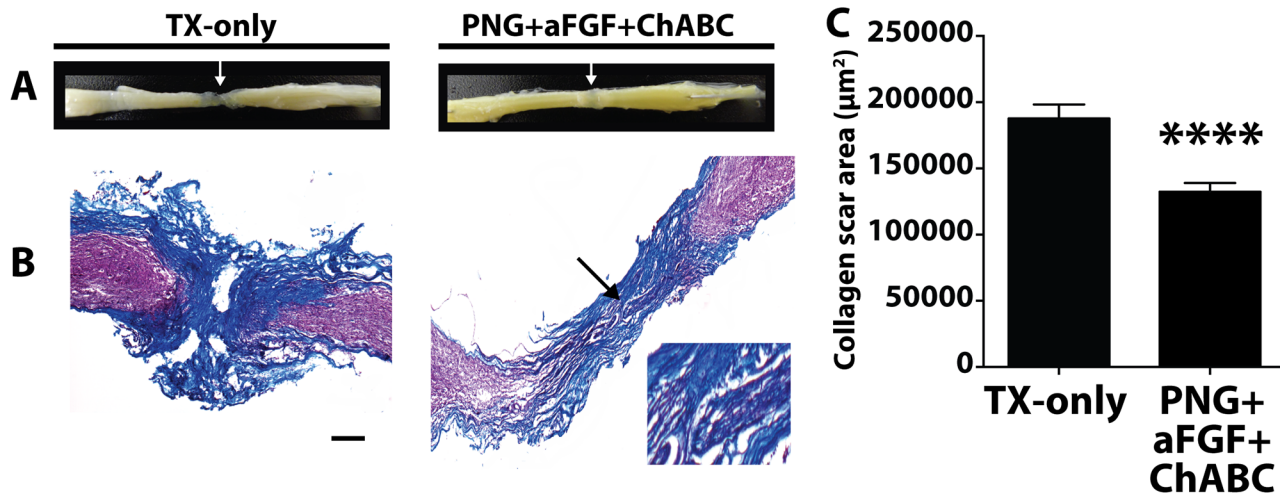

**Fig 3. PNG+aFGF+ChABC decreases collagen scarring in the lesion.** (A) Gross observation of the spinal cord at 18 weeks after SCI in TX-only and PNG+aFGF+ChABC animals. White arrow marks the lesion. (B) Representative photomicrographs of the spinal cord lesion stained with Masson's trichrome from TX-only and PNG+aFGF+ChABC mice 18 weeks post injury. The morphology of the PNG can be visualized in the PNG+aFGF+ChABC treated animals. Arrow marks the PNG and area of expanded view. Scale bar, 200µm. Rostral is to the left, and caudal to the right. Collagen is stained blue. (C) Collagen scar area (µm<sup>2</sup>). The PNG+aFGF+ChABC group shows a significant reduction of collagen scarring compared to the TX-only group. Five serial sections per animal were quantified, n = 5 animals per group. \*\*\*\*p<0.0001.

doi:10.1371/journal.pone.0139335.g003

fibers were identified only in the rostral penumbra of the lesion in the TX-only group. They did not penetrate deeply within the lesion nor did they ever regenerate beyond the lesion (Fig 4A–4D). In the PNG+aFGF+ChABC group, both 5-HT- (Fig 4E and 4F) and TH-positive fibers (Fig 4G and 4H) were visualized crossing the rostral spinal cord-PNG interface (Fig 4F' and 4H') to enter the PNG (Fig 4F'' and 4H'') to enter the PNG (Fig 4F''' and 4H'''). Importantly, some fibers continued into the distal caudal spinal cord (Fig 4F'''' and 4H''') beyond the caudal PNG-spinal cord interface. Quantitative analyses of fibers in the distal spinal cord confirmed the presence of regenerated 5-HT (Fig 4I) and TH (Fig 4J) fibers beyond the PNG.

Since both 5-HT and TH tracts mediate LUT recovery in the rat, we sought to correlate bladder recovery with regeneration in the mouse model. At the individual animal level, 5-HT regeneration was significantly correlated with an improvement of CMG parameters including the decreasing of pressure difference from the baseline to post void, the increasing of bladder contraction interval, and the decreasing of residual volume (Fig 5A–5D). No such correlation was found with TH regeneration, however, the baseline pressure following a void showed a non-significant trend (Fig 5E–5H). These results suggest 5-HT regeneration may be more important than TH regeneration for bladder recovery in a mouse model of SCI.

## Discussion

### Overview of results

The results of our investigation demonstrate the feasibility of employing the PNG+aFGF+ChABC combinatorial repair strategy in mice. These results corroborate our previous work [8] demonstrating that the triple combination treatment leads to improvements in voiding patterns, diminished detrusor sphincter dyssynergia, enhanced voiding efficiency, and improved bladder and EUS morphology. We also demonstrated a reduction in collagen scarring and regeneration of 5-HT and TH neurons through the peripheral nerve graft into the caudal cord. Our results suggest that 5-HT regeneration is more important for LUT recovery in the mouse than TH regeneration. In the rat, 5-HT innervation of the dorsal lateral nucleus of the



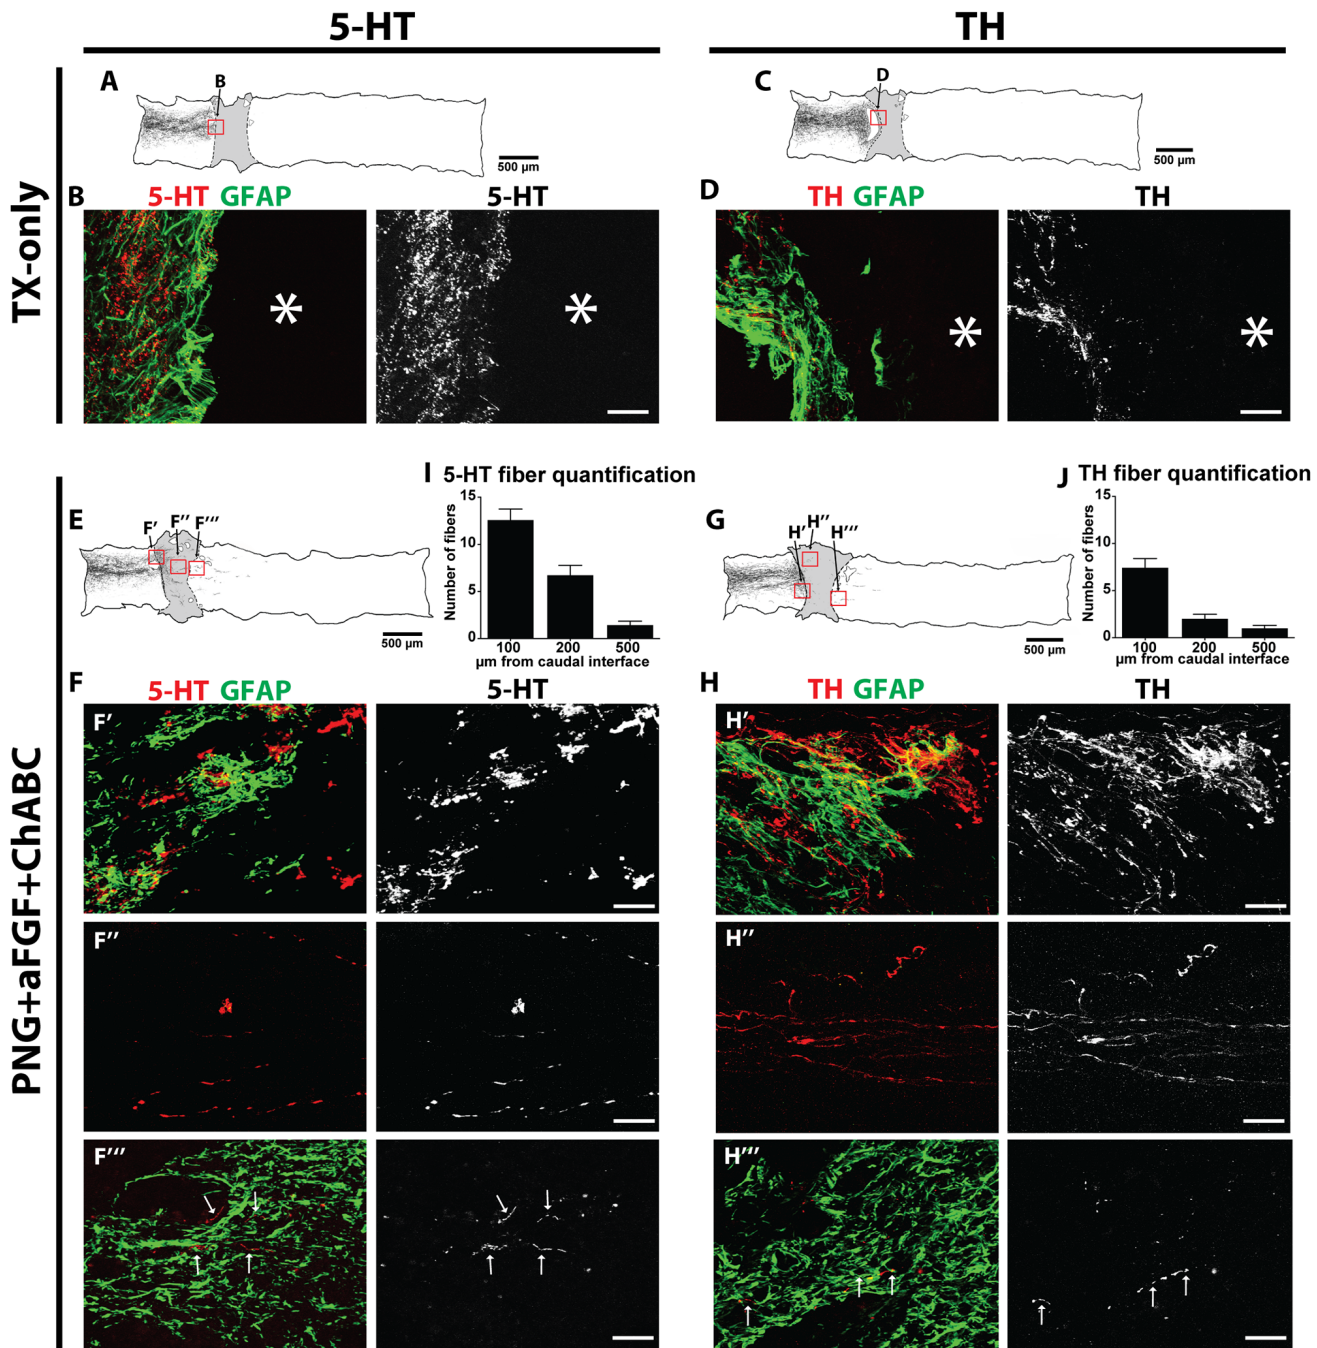

**Fig 4. PNG+aFGF+ChABC treatment induces 5-HT and TH regeneration 18 weeks post-complete spinal cord transection.** TX-Only: (A) Camera lucida tracing of 5-HT immunoreactive fibers in a TX-only animal. (B) 5-HT and GFAP immunostaining of the boxed area in (A), scale bar, 50  $\mu$ m. (C) Camera lucida tracing of TH-immunoreactive fibers in a TX-only animal. (D) TH and GFAP immunostaining of the boxed area in (C). Scale bar, 50  $\mu$ m. PNG+aFGF+ChABC: (E) Camera lucida tracing of 5-HT-immunoreactive fibers in PNG+aFGF+ChABC. (F) 5-HT and GFAP immunostaining of boxed areas in (E): (F') Rostral spinal cord-PNG interface; (F'') within the PNG; (F''') caudal spinal cord. Scale bar, 50  $\mu$ m. (G) Camera lucida tracing of TH-immunoreactive fibers in a PNG+aFGF+ChABC-treated animal. (H) TH and GFAP immunostaining of boxed areas in (G): (H') Rostral spinal cord-PNG interface; (H'') within the PNG; (H''') caudal spinal cord. Scale bar, 50  $\mu$ m. (I) Quantification of 5-HT-immunoreactive fibers found in caudal spinal cord, n = 7. (J) Quantification of TH-immunoreactive fibers found in caudal spinal cord, n = 7. Only animals whose spinal cord was processed and cut sagittally were included in the analysis.

doi:10.1371/journal.pone.0139335.g004

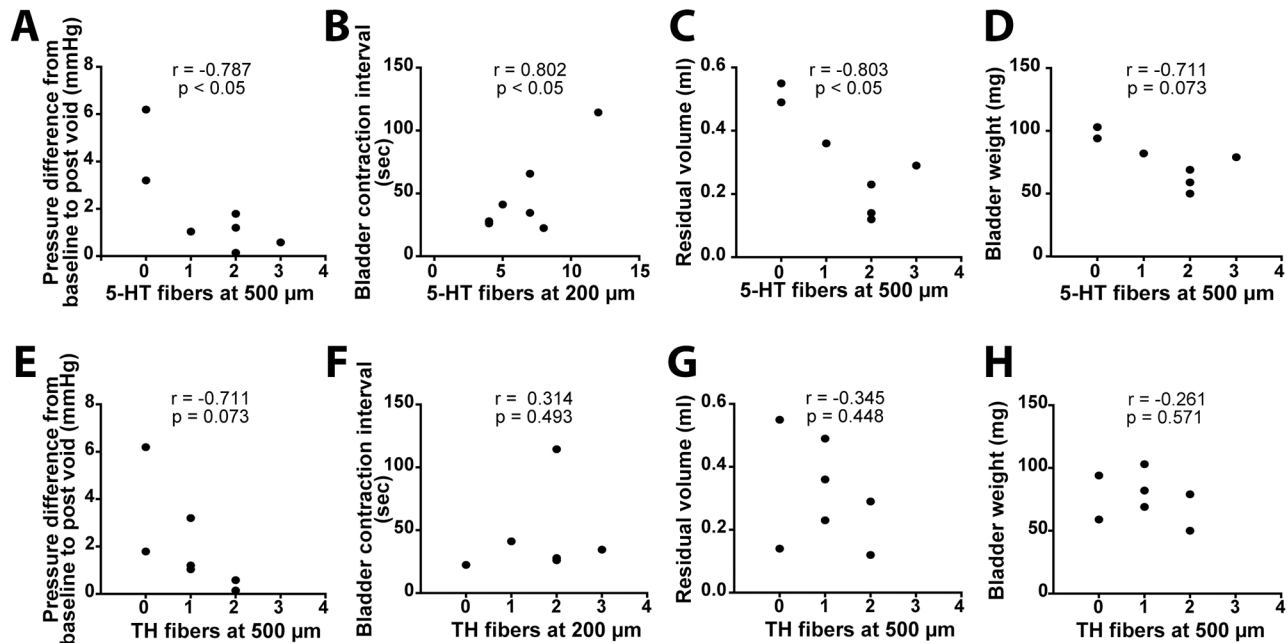

**Fig 5. 5-HT regeneration correlates to LUT function recovery.** Pearson correlation coefficient (*r* value) comparing bladder recovery to the number of regenerating (A-D) 5-HT and (E-H) TH fibers found in the caudal cord 200µm or 500µm from the PNG-cord interface. The number of regenerated 5-HT fibers below the lesion site shows a significant correlation with the improvement of CMG parameters. There is no significant correlation between regeneration of the TH fibers and CMG parameter analysis. Only animals whose spinal cord was processed and cut sagittally were included in the analysis. *n* = 7.

doi:10.1371/journal.pone.0139335.g005

lumbosacral spinal cord is required for the induction of EUS bursting activity during a void, and regeneration of the 5-HT tract is required for meaningful LUT recovery [26]. Conversely, silent periods or low EUS activity periods are important for efficient voiding in the mouse, and serotonin’s contribution to LUT recovery in a mouse model of SCI is not well understood. Nonetheless 5-HT regeneration is most likely needed for recovery in both models. The presence of 5-HT fibers distal to the lesion may also contribute to the preservation of the EUS muscle integrity by increasing the excitability of and synaptic input to motor neurons [27], as we have previously reported that PNGs enhance 5-HT regeneration and preservation of muscle mass and the myosin heavy chain phenotype following complete spinal cord injury [28]. Our previous rat study showed that TH regeneration is also required for efficient voiding, however, we found only trending correlation of TH regeneration and LUT function in a single parameter in the mouse model of SCI. Further, it is possible that chondroitinase and aFGF could be sufficient without the need of a graft to realize benefit by facilitating remodeling of intact spinal circuits. While the regeneration of 5-HT and TH fibers or other descending systems (not identified in the current study) likely contributes to bladder functional recovery, the precise role of frank regeneration in improved LUT behavior in the mouse remains to be determined by further investigation.

Although improvements in LUT recovery and axonal regeneration were evident with our triple combination therapy, the mouse model did not show the same strong nerve regeneration effects in both the 5-HT and TH systems as our previous rat study, in terms of either amount and distance [8]. This could be due to a variety of factors. First, the interface between the PNG and host tissues in the present study was not as striking as in our previous study in rats [8]. Second, mice, like humans, never develop a spinal reflex of urination after injury, while rats do. Sporadic recovery in the rat may prime the bladder circuitry such that with axonal regeneration,

greater recovery is possible. Third, the pathology of the mouse SCI may perturb axonal regeneration. A mouse spinal cord lesion fills up with a dense fibrous connective tissue [15] rich in collagen which can act as a physical barrier to regeneration, while the transected rat spinal cord exhibited little collagen scarring. Lastly, due to the small size of the mouse, there are technical difficulties associated with placing a compressive S-shaped mono-filament surgical steel wire to stabilize the vertebral column in a dorsiflexed position, as we were able to do in the rat study. In rats, failure to stabilize the cord resulted in hindered regeneration [29]. Although it is likely the regenerating 5-HT and TH neurons failed to reinnervate their original target, there is considerable evidence that relay circuits can confer functional benefits distant from regenerating or injury induced sprouting tracts. For example, in the transected cord of the zebra fish, 5-HT and TH axons regenerate but fail to directly reinnervate their original motor neuron targets, however full recovery of swimming capability is achieved [30]. Similar observations have been made in the cortical spinal tract of primates, which normally have monosynaptic innervation onto motor neurons. Following transection of the corticomotoneuronal pathway, a disynaptic network forms restoring partial motor recovery [31].

### PNGs create a favorable regenerative environment

The concept of engrafting tissue or cells into an SCI lesion site to create a permissive environment for axonal regeneration has been proposed for almost a century [32]. Many different types of tissues or cells have been used, with varying levels of success, including Schwann cells [33], olfactory ensheathing cells [34,35], bone marrow-derived mononuclear cells [36], astrocytes [37,38], and various types of stem or progenitor cells [39–42]. To date, the application of the autologous peripheral nerve graft has been successfully used in animal studies [23,24,43–47] and even in human patients with SCI [48,49]. A PNG bridge provides a permissive, directional substrate to encourage and guide long-distance regeneration, and resident Schwann cells provide trophic support and can remyelinate the axons. Axonal growth into and along the PNG is robust, but most axons fail to exit the distal end of the graft. Expectedly, in studies using only a PNG, there is no behavioral improvement. In a primate model of SCI, transplantation of PNGs led to similar levels of axonal regeneration into the graft as seen in rodent studies [46]. Although no improvements in behavior were observed, this study demonstrated the capacity for primate CNS axons to grow into a PNG. These studies demonstrate a reproducible technique to regenerate axons past a lesion site. The challenges that lay ahead are to promote the re-entry of axons at the distal end of the graft back into the spinal cord.

### aFGF contributions to regeneration

Addition of growth factors to the PNG/cord interface, namely aFGF, can help bring about meaningful, physiologically-relevant regeneration [23,24,50]. aFGF can act through various mechanisms to enhance regeneration, as it interacts with many different FGF receptors and cells [51]. Several studies have identified FGF's role in the reduction of collagen related scar formation and in down regulation of collagen gene expression in fibroblast [52–54]. Our study showed that PNG+aFGF+ChABC treatment reduced the collagen deposit which may be attributed to the effect of FGF application. It has been shown frequently that aFGF reduces axonal dieback and promotes regeneration thorough a graft [23,24,50,55]. Failure to include aFGF in a PNG or Schwann cell graft significantly diminishes the number of regenerating axons found within the graft [8,56]. aFGF may also be acting to decrease astrocyte activation [57] and to promote astrocyte migration and morphogenesis [8,58], encouraging better integration between the PNG and spinal cord. However, the aligned bipolar morphology of astrocytes between PNG and host tissues in this mouse model was not as obvious as in our previous rat

study [8]. This can be attributed to more fibrotic scarring at the interface. Other trophic factors such as GDNF [59] can also be considered to further improve the interface.

## CSPGs impair axonal regeneration

A major impedance to regenerating axons following SCI is the upregulation of inhibitory CSPGs in the extracellular matrix. Digestion of CSPG side chains with the bacterial enzyme ChABC enhances axonal regeneration and sprouting in a variety of injury models [37,47,60,61]. The digestion of CSPGs also promotes the migration and integration of Schwann cells from the PNG into the host spinal cord [62] and aligns astrocytes towards the injury site [63]. Additionally, CSPG degradation of the perineuronal net distal to the graft could promote remodeling of spared pathways and integration of regenerating fibers into spared circuits [64]. Chondroitinase may also be modulating macrophage activation towards a more permissive phenotype [65], which has been shown to enhance axonal elongation in a CSPG-rich environment [66]. Failure to use chondroitinase in a PNG repair model of SCI results in very few axons leaving the graft/chord interface and causes diminished recovery [8,60].

## Conclusions

The current study suggests that peripheral nerve autografts supplemented with aFGF and chondroitinase support meaningful recovery of the lower urinary tract. This combinatorial therapy has shown efficacy in a number of different animal models and provides support for the need to target multiple modalities in the treatment of severe spinal cord injury.

## Supporting Information

**S1 Fig. A comparison of collagen distribution in mouse and rat after complete spinal cord transection.** Representative photomicrographs of the spinal cord lesion stained with Masson's trichrome from the transected mouse cord at 18 weeks post injury or the transected rat cord at 16 weeks post injury. Scale bar, 200 $\mu$ m for the mouse, 1mm for the rat. Left is rostral and right is caudal.  
(TIF)

## Acknowledgments

We would like to thank Dr. Brad Lang for his assistance in animal care and Dr. Christopher Nelson (Cleveland Clinic) for editorial assistance and critical reading of the manuscript.

## Author Contributions

Conceived and designed the experiments: MD JS YSL. Performed the experiments: MD CYL YSL. Analyzed the data: MD CYL YSL. Contributed reagents/materials/analysis tools: JS YSL. Wrote the paper: MD CYL JS YSL.

## References

1. Filbin MT. Myelin-associated inhibitors of axonal regeneration in the adult mammalian CNS. *Nat Rev Neurosci.* 2003; 4: 703–713. doi: [10.1038/nrn1195](https://doi.org/10.1038/nrn1195) PMID: [12951563](https://pubmed.ncbi.nlm.nih.gov/12951563/)
2. Cregg JM, DePaul MA, Filous AR, Lang BT, Tran A, Silver J. Functional regeneration beyond the glial scar. *Exp Neurol.* 2014; 253: 197–207. doi: [10.1016/j.expneurol.2013.12.024](https://doi.org/10.1016/j.expneurol.2013.12.024) PMID: [24424280](https://pubmed.ncbi.nlm.nih.gov/24424280/)
3. Park KK, Liu K, Hu Y, Smith PD, Wang C, Cai B, et al. Promoting axon regeneration in the adult CNS by modulation of the PTEN/mTOR pathway. *Science.* 2008; 322: 963–966. doi: [10.1126/science.1161566](https://doi.org/10.1126/science.1161566) PMID: [18988856](https://pubmed.ncbi.nlm.nih.gov/18988856/)



4. Smith PD, Sun F, Park KK, Cai B, Wang C, Kuwako K, et al. SOCS3 deletion promotes optic nerve regeneration in vivo. *Neuron*. Elsevier; 2009; 64: 617–623. doi: [10.1016/j.neuron.2009.11.021](https://doi.org/10.1016/j.neuron.2009.11.021)
5. Fitch MT, Doller C, Combs CK, Landreth GE, Silver J. Cellular and molecular mechanisms of glial scarring and progressive cavitation: in vivo and in vitro analysis of inflammation-induced secondary injury after CNS trauma. *Journal of Neuroscience*. 1999; 19: 8182–8198. PMID: [10493720](https://pubmed.ncbi.nlm.nih.gov/10493720/)
6. Tuszynski MH, Gabriel K, Gage FH, Suhr S, Meyer S, Rosetti A. Nerve growth factor delivery by gene transfer induces differential outgrowth of sensory, motor, and noradrenergic neurites after adult spinal cord injury. *Exp Neurol*. 1996; 137: 157–173. doi: [10.1006/exnr.1996.0016](https://doi.org/10.1006/exnr.1996.0016) PMID: [8566208](https://pubmed.ncbi.nlm.nih.gov/8566208/)
7. Bradbury EJ, Moon LDF, Popat RJ, King VR, Bennett GS, Patel PN, et al. Chondroitinase ABC promotes functional recovery after spinal cord injury. *Nature*. 2002; 416: 636–640. doi: [10.1038/416636a](https://doi.org/10.1038/416636a) PMID: [11948352](https://pubmed.ncbi.nlm.nih.gov/11948352/)
8. Lee Y-S, Lin C-Y, Jiang H-H, DePaul MA, Lin VW, Silver J. Nerve regeneration restores supraspinal control of bladder function after complete spinal cord injury. *Journal of Neuroscience*. 2013; 33: 10591–10606. doi: [10.1523/JNEUROSCI.1116-12.2013](https://doi.org/10.1523/JNEUROSCI.1116-12.2013) PMID: [23804083](https://pubmed.ncbi.nlm.nih.gov/23804083/)
9. Lu P, Yang H, Jones LL, Filbin MT, Tuszynski MH. Combinatorial therapy with neurotrophins and cAMP promotes axonal regeneration beyond sites of spinal cord injury. *Journal of Neuroscience*. 2004; 24: 6402–6409. doi: [10.1523/JNEUROSCI.1492-04.2004](https://doi.org/10.1523/JNEUROSCI.1492-04.2004) PMID: [15254096](https://pubmed.ncbi.nlm.nih.gov/15254096/)
10. Fouad K, Schnell L, Bunge MB, Schwab ME, Liebscher T, Pearse DD. Combining Schwann cell bridges and olfactory-ensheathing glia grafts with chondroitinase promotes locomotor recovery after complete transection of the spinal cord. *Journal of Neuroscience*. 2005; 25: 1169–1178. doi: [10.1523/JNEUROSCI.3562-04.2005](https://doi.org/10.1523/JNEUROSCI.3562-04.2005) PMID: [15689553](https://pubmed.ncbi.nlm.nih.gov/15689553/)
11. Farooque M, Isaksson J, Olsson Y. White matter preservation after spinal cord injury in ICAM-1/P-selectin-deficient mice. *Acta Neuropathol*. 2001; 102: 132–140. PMID: [11563627](https://pubmed.ncbi.nlm.nih.gov/11563627/)
12. Lee JK, Geoffroy CG, Chan AF, Tolentino KE, Crawford MJ, Leal MA, et al. Assessing spinal axon regeneration and sprouting in Nogo-, MAG-, and OMgp-deficient mice. *Neuron*. 2010; 66: 663–670. doi: [10.1016/j.neuron.2010.05.002](https://doi.org/10.1016/j.neuron.2010.05.002) PMID: [20547125](https://pubmed.ncbi.nlm.nih.gov/20547125/)
13. Goldshmit Y, Galea MP, Wise G, Bartlett PF, Turnley AM. Axonal regeneration and lack of astrocytic gliosis in EphA4-deficient mice. *Journal of Neuroscience*. 2004; 24: 10064–10073. doi: [10.1523/JNEUROSCI.2981-04.2004](https://doi.org/10.1523/JNEUROSCI.2981-04.2004) PMID: [15537875](https://pubmed.ncbi.nlm.nih.gov/15537875/)
14. Wrathall JR, Pettegrew RK, Harvey F. Spinal cord contusion in the rat: production of graded, reproducible, injury groups. *Exp Neurol*. 1985; 88: 108–122. doi: [10.1016/0014-4886\(85\)90117-7](https://doi.org/10.1016/0014-4886(85)90117-7) PMID: [3979505](https://pubmed.ncbi.nlm.nih.gov/3979505/)
15. Ma M, Basso DM, Walters P, Stokes BT, Jakeman LB. Behavioral and histological outcomes following graded spinal cord contusion injury in the C57Bl/6 mouse. *Exp Neurol*. 2001; 169: 239–254. doi: [10.1006/exnr.2001.7679](https://doi.org/10.1006/exnr.2001.7679) PMID: [11358439](https://pubmed.ncbi.nlm.nih.gov/11358439/)
16. Sroga JM, Jones TB, Kigerl KA, McGaughy VM, Popovich PG. Rats and mice exhibit distinct inflammatory reactions after spinal cord injury. *J Comp Neurol*. 2003; 462: 223–240. doi: [10.1002/cne.10736](https://doi.org/10.1002/cne.10736) PMID: [12794745](https://pubmed.ncbi.nlm.nih.gov/12794745/)
17. Cheng CL, de Groat WC. The role of capsaicin-sensitive afferent fibers in the lower urinary tract dysfunction induced by chronic spinal cord injury in rats. *Exp Neurol*. 2004; 187: 445–454. doi: [10.1016/j.expneurol.2004.02.014](https://doi.org/10.1016/j.expneurol.2004.02.014) PMID: [15144870](https://pubmed.ncbi.nlm.nih.gov/15144870/)
18. Fowler CJ, Griffiths D, de Groat WC. The neural control of micturition. *Nat Rev Neurosci*. Nature Publishing Group; 2008; 9: 453–466. doi: [10.1038/nrn2401](https://doi.org/10.1038/nrn2401)
19. Kakizaki H, de Groat WC. Reorganization of somato-urethral reflexes following spinal cord injury in the rat. *J Urol*. 1997; 158: 1562–1567. doi: [10.1016/S0022-5347\(01\)64280-0](https://doi.org/10.1016/S0022-5347(01)64280-0) PMID: [9302174](https://pubmed.ncbi.nlm.nih.gov/9302174/)
20. Kadekawa K, Yoshiyama M, Majima T, Wada N, Shimizu T, Tyagi P, et al. Characterization of bladder and external urethral sphincter activity in mice with or without spinal cord injury- A comparison study with rats. In: International Continence Society, Montreal, CA. 2015. Volume 241, Abstract 16979, p. 49.
21. Anderson KD. Targeting recovery: priorities of the spinal cord-injured population. *J Neurotrauma*. 2004; 21: 1371–1383. PMID: [15672628](https://pubmed.ncbi.nlm.nih.gov/15672628/)
22. Weld KJ, Dmochowski RR. Association of level of injury and bladder behavior in patients with post-traumatic spinal cord injury. *Urology*. 2000; 55: 490–494. doi: [10.1016/S0090-4295\(99\)00553-1](https://doi.org/10.1016/S0090-4295(99)00553-1) PMID: [10736489](https://pubmed.ncbi.nlm.nih.gov/10736489/)
23. Cheng H, Cao Y, Olson L. Spinal cord repair in adult paraplegic rats: partial restoration of hind limb function. *Science*. 1996; 273: 510–513. PMID: [8662542](https://pubmed.ncbi.nlm.nih.gov/8662542/)
24. Lee Y-S, Hsiao I, Lin VW. Peripheral nerve grafts and aFGF restore partial hindlimb function in adult paraplegic rats. *J Neurotrauma*. 2002; 19: 1203–1216. doi: [10.1089/08977150260338001](https://doi.org/10.1089/08977150260338001) PMID: [12427329](https://pubmed.ncbi.nlm.nih.gov/12427329/)

25. Kuo H-S, Tsai M-J, Huang M-C, Chiu C-W, Tsai C-Y, Lee M-J, et al. Acid fibroblast growth factor and peripheral nerve grafts regulate Th2 cytokine expression, macrophage activation, polyamine synthesis, and neurotrophin expression in transected rat spinal cords. *Journal of Neuroscience*. 2011; 31: 4137–4147. doi: [10.1523/JNEUROSCI.2592-10.2011](https://doi.org/10.1523/JNEUROSCI.2592-10.2011) PMID: [21411654](https://pubmed.ncbi.nlm.nih.gov/21411654/)
26. Chang H-Y, Cheng C-L, Chen J-JJ, de Groat WC. Serotonergic drugs and spinal cord transections indicate that different spinal circuits are involved in external urethral sphincter activity in rats. *Am J Physiol Renal Physiol*. 2007; 292: F1044–53. doi: [10.1152/ajprenal.00175.2006](https://doi.org/10.1152/ajprenal.00175.2006) PMID: [17047164](https://pubmed.ncbi.nlm.nih.gov/17047164/)
27. Stawińska U, Majczyński H, Djavadian R. Recovery of hindlimb motor functions after spinal cord transection is enhanced by grafts of the embryonic raphe nuclei. *Exp Brain Res*. 2000; 132: 27–38. PMID: [10836633](https://pubmed.ncbi.nlm.nih.gov/10836633/)
28. Lee Y-S, Lin C-Y, Caiozzo VJ, Robertson RT, Yu J, Lin VW. Repair of spinal cord transection and its effects on muscle mass and myosin heavy chain isoform phenotype. *J Appl Physiol*. 2007; 103: 1808–1814. doi: [10.1152/jappphysiol.00588.2007](https://doi.org/10.1152/jappphysiol.00588.2007) PMID: [17717118](https://pubmed.ncbi.nlm.nih.gov/17717118/)
29. Cheng H, Olson L. A new surgical technique that allows proximodistal regeneration of 5-HT fibers after complete transection of the rat spinal cord. *Exp Neurol*. 1995; 136: 149–161. doi: [10.1006/exnr.1995.1092](https://doi.org/10.1006/exnr.1995.1092) PMID: [7498405](https://pubmed.ncbi.nlm.nih.gov/7498405/)
30. Kuscha V, Barreiro-Iglesias A, Becker CG, Becker T. Plasticity of tyrosine hydroxylase and serotonergic systems in the regenerating spinal cord of adult zebrafish. *J Comp Neurol*. Wiley Subscription Services, Inc., A Wiley Company; 2012; 520: 933–951. doi: [10.1002/cne.22739](https://doi.org/10.1002/cne.22739)
31. Sasaki S, Isa T, Pettersson L-G, Alstermark B, Naito K, Yoshimura K, et al. Dexterous finger movements in primate without monosynaptic corticomotoneuronal excitation. *Journal of Neurophysiology*. American Physiological Society; 2004; 92: 3142–3147. doi: [10.1152/jn.00342.2004](https://doi.org/10.1152/jn.00342.2004)
32. Cajal SY. *Degeneration and Regeneration of the Nervous System*. London: Press; 1928.
33. Kanno H, Pearse DD, Ozawa H, Itoi E, Bunge MB. Schwann cell transplantation for spinal cord injury repair: its significant therapeutic potential and prospectus. *Rev Neurosci*. 2015. doi: [10.1515/revneuro-2014-0068](https://doi.org/10.1515/revneuro-2014-0068)
34. Stamegna JC, Felix MS, Roux-Peyronnet J, Rossi V, Féron F, Gauthier P, et al. Nasal OEC transplantation promotes respiratory recovery in a subchronic rat model of cervical spinal cord contusion. *Exp Neurol*. 2011; 229: 120–131. doi: [10.1016/j.expneurol.2010.07.002](https://doi.org/10.1016/j.expneurol.2010.07.002) PMID: [20633558](https://pubmed.ncbi.nlm.nih.gov/20633558/)
35. Ramón-Cueto A, Plant GW, Avila J, Bunge MB. Long-distance axonal regeneration in the transected adult rat spinal cord is promoted by olfactory ensheathing glia transplants. *J Neurosci*. 1998; 18: 3803–3815. PMID: [9570810](https://pubmed.ncbi.nlm.nih.gov/9570810/)
36. Yoshihara T, Ohta M, Itokazu Y, Matsumoto N, Dezawa M, Suzuki Y, et al. Neuroprotective effect of bone marrow-derived mononuclear cells promoting functional recovery from spinal cord injury. *J Neurotrauma*. 2007; 24: 1026–1036. doi: [10.1089/neu.2007.132R](https://doi.org/10.1089/neu.2007.132R) PMID: [17600518](https://pubmed.ncbi.nlm.nih.gov/17600518/)
37. Filous AR, Miller JH, Coulson-Thomas YM, Horn KP, Alilain W, Silver J. Immature astrocytes promote CNS axonal regeneration when combined with chondroitinase ABC. *Dev Neurobiol*. Wiley Subscription Services, Inc., A Wiley Company; 2010; 70: 826–841. doi: [10.1002/dneu.20820](https://doi.org/10.1002/dneu.20820)
38. Chu T, Zhou H, Li F, Wang T, Lu L, Feng S. Astrocyte transplantation for spinal cord injury: current status and perspective. *Brain Res Bull*. 2014; 107: 18–30. doi: [10.1016/j.brainresbull.2014.05.003](https://doi.org/10.1016/j.brainresbull.2014.05.003) PMID: [24878447](https://pubmed.ncbi.nlm.nih.gov/24878447/)
39. Busch SA, Hamilton JA, Horn KP, Cuascut FX, Cutrone R, Lehman N, et al. Multipotent adult progenitor cells prevent macrophage-mediated axonal dieback and promote regrowth after spinal cord injury. *Journal of Neuroscience*. 2011; 31: 944–953. doi: [10.1523/JNEUROSCI.3566-10.2011](https://doi.org/10.1523/JNEUROSCI.3566-10.2011) PMID: [21248119](https://pubmed.ncbi.nlm.nih.gov/21248119/)
40. Lu P, Wang Y, Graham L, McHale K, Gao M, Wu D, et al. Long-distance growth and connectivity of neural stem cells after severe spinal cord injury. *Cell*. Elsevier; 2012; 150: 1264–1273. doi: [10.1016/j.cell.2012.08.020](https://doi.org/10.1016/j.cell.2012.08.020)
41. Hodgetts SI, Simmons PJ, Plant GW. Human mesenchymal precursor cells (Stro-1<sup>+</sup>) from spinal cord injury patients improve functional recovery and tissue sparing in an acute spinal cord injury rat model. *Cell Transplant*. Cognizant Communication Corporation; 2013; 22: 393–412. doi: [10.3727/096368912X656081](https://doi.org/10.3727/096368912X656081)
42. Antonic A, Sena ES, Lees JS, Wills TE, Skeers P, Batchelor PE, et al. Stem cell transplantation in traumatic spinal cord injury: a systematic review and meta-analysis of animal studies. *Plos Biol*. 2013; 11: e1001738. doi: [10.1371/journal.pbio.1001738](https://doi.org/10.1371/journal.pbio.1001738) PMID: [24358022](https://pubmed.ncbi.nlm.nih.gov/24358022/)
43. David S, Aguayo AJ. Axonal elongation into peripheral nervous system “bridges” after central nervous system injury in adult rats. *Science*. 1981; 214: 931–933. doi: [10.1126/science.6171034](https://doi.org/10.1126/science.6171034) PMID: [6171034](https://pubmed.ncbi.nlm.nih.gov/6171034/)

44. Munz M, Rasminsky M, Aguayo AJ, Vidal-Sanz M, Devor MG. Functional activity of rat brainstem neurons regenerating axons along peripheral nerve grafts. *Brain Res.* 1985; 340: 115–125. PMID: [4027637](#)
45. Gauthier P, Réga P, Lammari-Barreault N, Polentes J. Functional reconnections established by central respiratory neurons regenerating axons into a nerve graft bridging the respiratory centers to the cervical spinal cord. *J Neurosci Res.* 2002; 70: 65–81. doi: [10.1002/jnr.10379](#) PMID: [12237865](#)
46. Levi ADO, Dancausse H, Li X, Duncan S, Horkey L, Oliveira M. Peripheral nerve grafts promoting central nervous system regeneration after spinal cord injury in the primate. *J Neurosurg.* 2002; 96: 197–205. doi: [10.3171/spi.2002.96.2.0197](#) PMID: [12450283](#)
47. Houle JD, Tom VJ, Mayes D, Wagoner G, Phillips N, Silver J. Combining an autologous peripheral nervous system “bridge” and matrix modification by chondroitinase allows robust, functional regeneration beyond a hemisection lesion of the adult rat spinal cord. *Journal of Neuroscience. Society for Neuroscience;* 2006; 26: 7405–7415. doi: [10.1523/JNEUROSCI.1166-06.2006](#)
48. Cheng H, Liao K-K, Liao S-F, Chuang T-Y, Shih Y-H. Spinal cord repair with acidic fibroblast growth factor as a treatment for a patient with chronic paraplegia. *Spine.* 2004; 29: E284–8. PMID: [15247588](#)
49. Tabakow P, Raisman G, Fortuna W, Czyz M, Huber J, Li D, et al. Functional regeneration of supraspinal connections in a patient with transected spinal cord following transplantation of bulbar olfactory ensheathing cells with peripheral nerve bridging. *Cell Transplant.* 2014; 23: 1631–1655. doi: [10.3727/096368914X685131](#) PMID: [25338642](#)
50. Tsai EC, Krassioukov AV, Tator CH. Corticospinal Regeneration into Lumbar Grey Matter Correlates with Locomotor Recovery after Complete Spinal Cord Transection and Repair with Peripheral Nerve Grafts, Fibroblast Growth Factor 1, Fibrin Glue, and Spinal Fusion. *J Neuropathol Exp Neurol.* 2005; 64: 230. PMID: [15804055](#)
51. Powers CJ, McLeskey SW, Wellstein A. Fibroblast growth factors, their receptors and signaling. *Endocr Relat Cancer.* 2000; 7: 165–197. PMID: [11021964](#)
52. Spyrou GE, Naylor IL. The effect of basic fibroblast growth factor on scarring. *Br J Plast Surg.* 2002; 55: 275–282. PMID: [12160530](#)
53. Eto H, Suga H, Aoi N, Kato H, Doi K, Kuno S, et al. Therapeutic potential of fibroblast growth factor-2 for hypertrophic scars: upregulation of MMP-1 and HGF expression. *Lab Invest.* 2012; 92: 214–223. doi: [10.1038/labinvest.2011.127](#) PMID: [21946856](#)
54. Tan EM, Rouda S, Greenbaum SS, Moore JH, Fox JW, Sollberg S. Acidic and basic fibroblast growth factors down-regulate collagen gene expression in keloid fibroblasts. *Am J Pathol. American Society for Investigative Pathology;* 1993; 142: 463–470.
55. Lee Y-S, Baratta J, Yu J, Lin VW, Robertson RT. aFGF promotes axonal growth in rat spinal cord organotypic slice co-cultures. *J Neurotrauma.* 2002; 19: 357–367. doi: [10.1089/089771502753594927](#) PMID: [11939503](#)
56. Guest JD, Hesse D, Schnell L, Schwab ME, Bunge MB, Bunge RP. Influence of IN-1 antibody and acidic FGF-fibrin glue on the response of injured corticospinal tract axons to human Schwann cell grafts. *J Neurosci Res.* 1997; 50: 888–905. PMID: [9418975](#)
57. Kang W, Balordi F, Su N, Chen L, Fishell G, Hébert JM. Astrocyte activation is suppressed in both normal and injured brain by FGF signaling. *Proc Natl Acad Sci USA.* 2014; 111: E2987–95. doi: [10.1073/pnas.1320401111](#) PMID: [25002516](#)
58. Goldshmit Y, Sztal TE, Jusuf PR, Hall TE, Nguyen-Chi M, Currie PD. Fgf-dependent glial cell bridges facilitate spinal cord regeneration in zebrafish. *J Neurosci. Soc Neuroscience;* 2012; 32: 7477–7492.
59. Deng L-X, Deng P, Ruan Y, Xu ZC, Liu N-K, Wen X, et al. A novel growth-promoting pathway formed by GDNF-overexpressing Schwann cells promotes propriospinal axonal regeneration, synapse formation, and partial recovery of function after spinal cord injury. *Journal of Neuroscience.* 2013; 33: 5655–5667. doi: [10.1523/JNEUROSCI.2973-12.2013](#) PMID: [23536080](#)
60. Alilain W, Horn KP, Hu H, Dick TE, Silver J. Functional regeneration of respiratory pathways after spinal cord injury. *Nature.* 2011; 475: 196–200. doi: [10.1038/nature10199](#) PMID: [21753849](#)
61. Starkey ML, Bartus K, Barritt AW, Bradbury EJ. Chondroitinase ABC promotes compensatory sprouting of the intact corticospinal tract and recovery of forelimb function following unilateral pyramidotomy in adult mice. *Eur J Neurosci.* 2012; 36: 3665–3678. doi: [10.1111/ejn.12017](#) PMID: [23061434](#)
62. Grimpe B, Pressman Y, Lupa MD, Horn KP, Bunge MB, Silver J. The role of proteoglycans in Schwann cell/astrocyte interactions and in regeneration failure at PNS/CNS interfaces. *Mol Cell Neurosci.* 2005; 28: 18–29. doi: [10.1016/j.mcn.2004.06.010](#) PMID: [15607938](#)
63. Milbreta U, Boxberg von Y, Mailly P, Nothias F, Soares S. Astrocytic and vascular remodeling in the injured adult rat spinal cord after chondroitinase ABC treatment. *J Neurotrauma.* 2014; 31: 803–818. doi: [10.1089/neu.2013.3143](#) PMID: [24380419](#)

64. Massey JM, Hubscher CH, Wagoner MR, Decker JA, Amps J, Silver J, et al. Chondroitinase ABC digestion of the perineuronal net promotes functional collateral sprouting in the cuneate nucleus after cervical spinal cord injury. *Journal of Neuroscience*. 2006; 26: 4406–4414. doi: [10.1523/JNEUROSCI.5467-05.2006](https://doi.org/10.1523/JNEUROSCI.5467-05.2006) PMID: [16624960](https://pubmed.ncbi.nlm.nih.gov/16624960/)
65. Bartus K, James ND, Didangelos A, Bosch KD, Verhaagen J, Yáñez-Muñoz RJ, et al. Large-scale chondroitin sulfate proteoglycan digestion with chondroitinase gene therapy leads to reduced pathology and modulates macrophage phenotype following spinal cord contusion injury. *Journal of Neuroscience*. 2014; 34: 4822–4836. doi: [10.1523/JNEUROSCI.4369-13.2014](https://doi.org/10.1523/JNEUROSCI.4369-13.2014) PMID: [24695702](https://pubmed.ncbi.nlm.nih.gov/24695702/)
66. Kigerl KA, Gensel JC, Ankeny DP, Alexander JK, Donnelly DJ, Popovich PG. Identification of two distinct macrophage subsets with divergent effects causing either neurotoxicity or regeneration in the injured mouse spinal cord. *Journal of Neuroscience*. 2009; 29: 13435–13444. doi: [10.1523/JNEUROSCI.3257-09.2009](https://doi.org/10.1523/JNEUROSCI.3257-09.2009) PMID: [19864556](https://pubmed.ncbi.nlm.nih.gov/19864556/)
